# Supplementary material for: EndoVAscular treatment and ThRombolysis for Ischemic Stroke Patients (EVA-TRISP) registry: basis and methodology of a pan-European prospective ischaemic stroke revascularisation treatment registry
Source: PubMed Central journal article supplement (PMC8354282; doi:10.1136/bmjopen-2020-042211), 2021-08-08
Supplement: bmjopen-2020-042211supp002.pdf [file bmjopen-2020-042211supp002.pdf]

## Appendix 3: Names of the ethics committees

| City       | Ethics committees                                                                                                                                           |
|------------|-------------------------------------------------------------------------------------------------------------------------------------------------------------|
| Amsterdam  | Anonymized registry based research does not need ethical approval in The Netherlands                                                                        |
| Basel      | The ethics committee Basel (Ethikkommission Nordwest- und Zentralschweiz (EKNZ))                                                                            |
| Belgrade   | The ethics committee of Clinical Centre of Serbia                                                                                                           |
| Berlin     | The ethical review committee of the Charité–University Medicine Berlin                                                                                      |
| Bern       | The cantonal ethics Committee Bern                                                                                                                          |
| Bremen     | The local ethic committee of the Ärztekammer Bremen                                                                                                         |
| Bologna    | Local regulations do not require approval by the ethics board for observational studies using registry data in IRCCS (Institute for Treatment and Research) |
| Brescia    | EC ASST spedali civili university hospital Brescia                                                                                                          |
| Goettingen | The ethics committee in Goettingen approved it (No.: 16/2/16).                                                                                              |
| Gothenburg | The regional ethical board of Gothenburg                                                                                                                    |
| Heidelberg | Ethik kommission der Medizinischen Fakultät Heidelberg                                                                                                      |
| Helsinki   | Local regulations do not require approval by the ethics board for retrospective studies using registry data                                                 |
| Larissa    | Participation in EVA-TRISP does not require ethics approval in Greece                                                                                       |
| Jerusalem  | Hadassah Medical Organization (HMO) Jerusalem                                                                                                               |
| Lausanne   | The ethics commission for research on humans of the Canton of Vaud has approved the scientific use data from the ASTRAL registry                            |
| Lille      | Comité de Protection des Personnes Nord Ouest IV Lille, France                                                                                              |
| Modena     | The study was approved by local EC called "Comitato Etico Area Vasta Emilia Nord"                                                                           |
| Munich     | The ethics committee of the chamber of physicians at Ludwig-Maximilians University LMU Munich                                                               |
| St. Gallen | Each study project has been approved by the ethical committee                                                                                               |
| Zurich     | The ethics commission Zurich, Switzerland.                                                                                                                  |
